# Supplementary material for: A systematic review of real-world diabetes prevention programs: learnings from the last 15 years
Source: PubMed Central journal article supplement (PMC4681022; doi:10.1186/s13012-015-0354-6), 2015-12-15
Supplement: 13012_2015_354_MOESM1_ESM.pdf [file 13012_2015_354_MOESM1_ESM.pdf]

## **A systematic review of real-world diabetes prevention programs: learnings from the last 15 years.**

### **Search Strategy**

#### ***PubMed (10/Feb/2014)***

|                                                                     |         |
|---------------------------------------------------------------------|---------|
| 1. Diabetes[Title/Abstract]                                         | 320,653 |
| 2. (prevention[Title/Abstract]) OR preventing[Title/Abstract]       | 452,289 |
| 3. (program[Title/Abstract]) OR programme[Title/Abstract]           | 350,373 |
| 4. (intervention[Title/Abstract]) OR interventions[Title/Abstract]  | 512,588 |
| 5. #3 OR #4                                                         | 815,917 |
| 6. (implementation[Title/Abstract]) OR implementing[Title/Abstract] | 143,739 |
| 7. (translation[Title/Abstract]) OR translating[Title/Abstract]     | 89,807  |
| 8. #6 OR #7                                                         | 231,498 |
| 9. #1 AND #2 AND #5 AND #8                                          | 507     |

#### ***Web of Science (10/Feb/2014)***

TOPIC: (diabetes prevention) AND TOPIC: (intervention OR program)  
AND TOPIC: (implementation OR translation) NOT TOPIC: (type 1) NOT TOPIC: (kidney)  
Timespan=2001-2014. Indexes=SCI-EXPANDED, SSCI, CCR-EXPANDED, IC.

- All (365)

#### ***MEDLINE (10/Feb/2014)***

|                                                                                                                                                                      |         |
|----------------------------------------------------------------------------------------------------------------------------------------------------------------------|---------|
| 1. Diabetes.mp. or Diabetes, Gestational/ or Diabetes Complications/ or Diabetes Mellitus, Experimental/ or exp Diabetes Mellitus/ or exp Diabetes Mellitus, Type 2/ | 399,338 |
|----------------------------------------------------------------------------------------------------------------------------------------------------------------------|---------|

|                                                                           |         |
|---------------------------------------------------------------------------|---------|
| 2. exp Primary Prevention/ or Prevention.mp. or exp Secondary Prevention/ | 442,300 |
| 3. Diabetes Mellitus/ or Preventing                                       | 196,772 |
| 4. #2 OR #3                                                               | 617,050 |
| 5. program or programme or intervention or interventions                  | 776,170 |
| 6. implementation or implementing or translation or translating           | 203,957 |
| 7. #1 AND #4 AND #5 AND #6                                                | 846     |

**CENTRAL (17/Feb/2014)**

|                                   |         |
|-----------------------------------|---------|
| 1. Diabetes                       | 28,504  |
| 2. Prevention OR preventing       | 123,018 |
| 3. Program or programme           | 54,085  |
| 4. Intervention or interventions  | 104,485 |
| 5. #3 OR #4                       | 132,644 |
| 6. Implementation or implementing | 13,155  |
| 7. Translation or translating     | 6,209   |
| 8. #6 OR #7                       | 18,076  |
| 9. #1 AND #2 AND #5 AND #8        | 1,366   |
| 10. Trials                        | 180     |

**EMBASE (10/Feb/2014)**

|                     |           |
|---------------------|-----------|
| 1. 'diabetes'/exp   | 480,005   |
| 2. 'prevention'/exp | 2,311,308 |
| 3. 'program'        | 879,533   |

|                      |           |
|----------------------|-----------|
| 4. 'intervention'    | 495,471   |
| 5. #3 OR #4          | 1,314,953 |
| 6. Implementation    | 143,654   |
| 7. Translation       | 666,965   |
| 8. #6 OR #7          | 808,155   |
| 9. #1 AND #2         | 82,216    |
| 10. #9 AND #5 AND #8 | 1,094     |

**Total Records Found:**

1. PubMed (507)
2. Web of Science (365)
3. MEDLINE (846)
4. CENTRAL (180)
5. EMBASE (1,094)

**Total = 2,992**
